# Supplementary material for: CO oxidation activity of Pt, Zn and ZnPt nanocatalysts: a comparative study by in situ near-ambient pressure X-ray photoelectron spectroscopy
Source: Royal Society of Chemistry journal article supplement (doi:10.1039/c7nr07981h), 2018-01-01
Supplement: c7nr07981h1.pdf [file c7nr07981h1.pdf]

## Supplementary Information

### CO oxidation activity of Pt, Zn and ZnPt nanocatalysts: a comparative study with *in situ* Near-Ambient Pressure X-ray Photoelectron Spectroscopy

Ahmed Naitabdi,<sup>1\*</sup> Anthony Boucly,<sup>1</sup> François Rochet<sup>1</sup>, Robert Fagiewicz,<sup>1</sup> Giorgia Olivieri,<sup>2</sup> Fabrice Bournel,<sup>1</sup> Rabah Benbalagh,<sup>1</sup> Fausto Sirotti,<sup>2</sup> and Jean-Jacques Gallet<sup>1</sup>

<sup>1</sup> Sorbonne Université, CNRS, Laboratoire de Chimie Physique Matière et Rayonnement, 4 place Jussieu, 75005 Paris, France

<sup>2</sup>Synchrotron SOLEIL, L'Orme des Merisiers, Saint-Aubin, 91192 Gif sur Yvette, France

**Supplementary information.** STM images of ZnPt NPs after annealing in UHV at 500 K and after exposure to pure O<sub>2</sub> at 1 mbar pressure at 500 K. Gas phase CO core-level spectra at photon energies  $h\nu = 400$  eV. In situ core-level spectra of Ti 2p at  $h\nu = 560$  eV and Pt 4f at two photon energies,  $h\nu = 400$  eV and  $h\nu = 165$  eV. The fitting parameters of Pt 4f in pure Pt and ZnPt NPs at  $h\nu = 400$  eV. In situ Core-level spectra in the binding energy region of Pt 4f and Zn 3p recorded at photon energies of  $h\nu = 400$  eV and  $h\nu = 165$  eV recorded on ZnPt samples.

**S1. STM images after annealing in UHV at 500 K and after annealing at 500 K under 1 mbar of pure O<sub>2</sub> at 500 K**

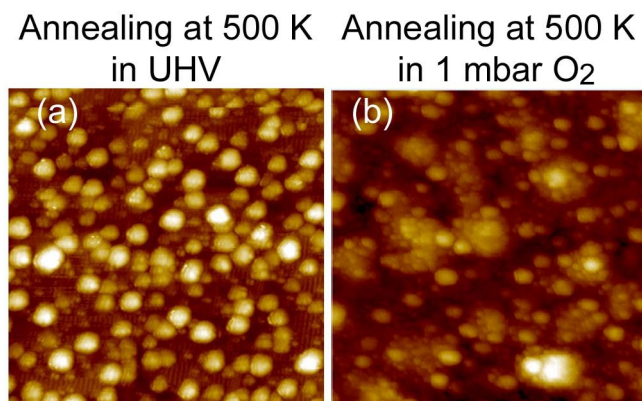

Figure S1: (50 nm × 50 nm) STM images of ZnPt NPs deposited on TiO<sub>2</sub>(110). (a) after annealing at 500 K in UHV. (b) after annealing at 500 K under 1 mbar of O<sub>2</sub>. The image (b) was recorded after pumping the gas. Note the strong roughening of the surface after annealing at 500 K under 1 mbar of O<sub>2</sub>.

**S2. Gas phase CO core-level spectra**

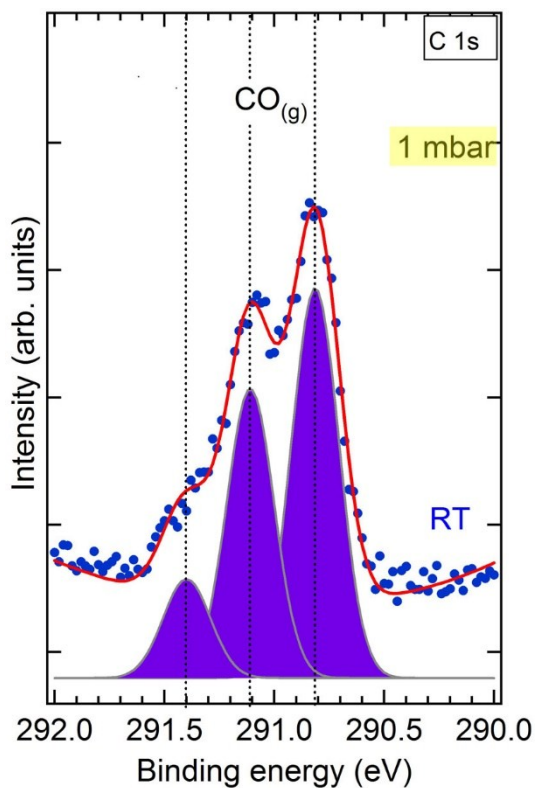

Figure S2. CO gas phase ( $\text{CO}_{(g)}$ ) in C 1s spectrum measured at  $h\nu=400$  eV fitted with a vibrational progression  $\nu'=0$  (adiabatic peak),  $\nu'=1$  and  $\nu'=2$ , distant by 300 meV each,<sup>1</sup> with a FWHM of 280 meV. This gas phase region is extracted from the C 1s spectra of Zn NPs at RT shown in Figure 3b. The spectrum was recorded under a pressure of 1 mbar and with a  $\text{CO}:\text{O}_2$  ratio of 1:4.

### S3. Ti 2p core-level spectra

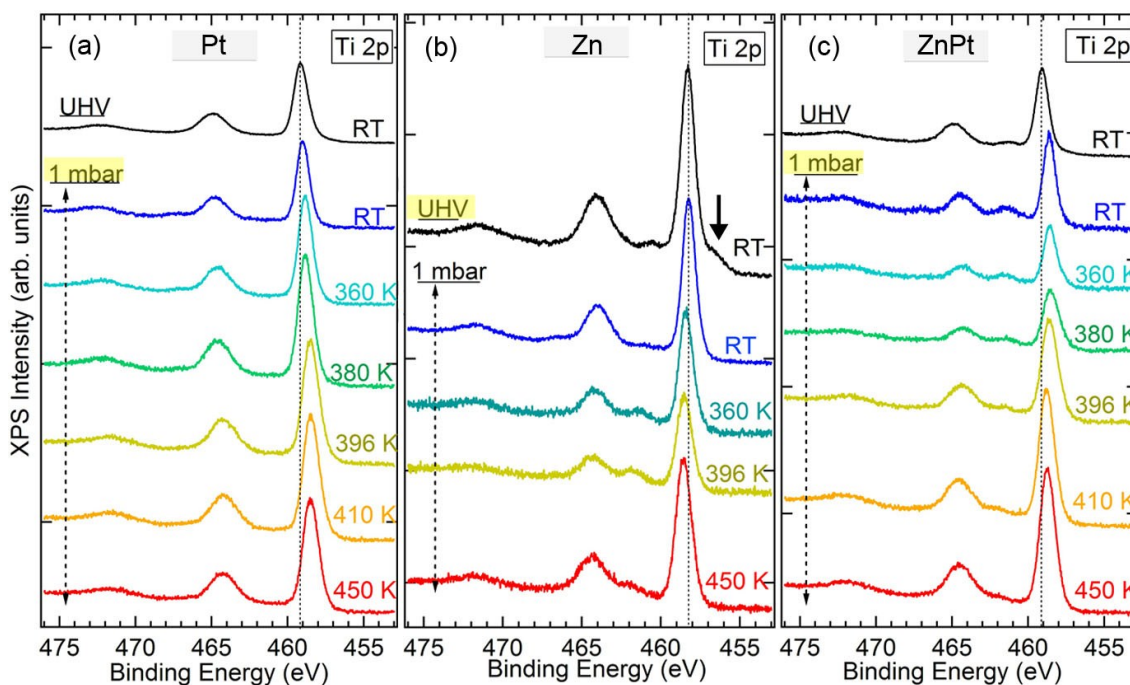

Figure S3: Temperature dependence of the Ti 2p core-level spectra of the pure Pt NPs (a) pure Zn NPs (b) and bimetallic ZnPt NPs (c) supported on  $\text{TiO}_2(110)$  in a mixture of  $\text{CO}:\text{O}_2$  (1:4) under a total pressure of 1 mbar. The spectra recorded at a photon energy  $h\nu$  of 560 eV. The spectrum denoted “UHV” was recorded at room temperature (RT) before exposure to gases. In panel (b) the shoulder to the right of the Ti  $2p_{3/2}$  component (arrow) indicates the formation of  $\text{Ti}^{3+}$  after Zn deposition at room temperature. An exposure to the oxygen rich mixture quenches this component. RT=293 K.

#### S4. Pt 4f spectra at photon energy $h\nu = 400$ eV

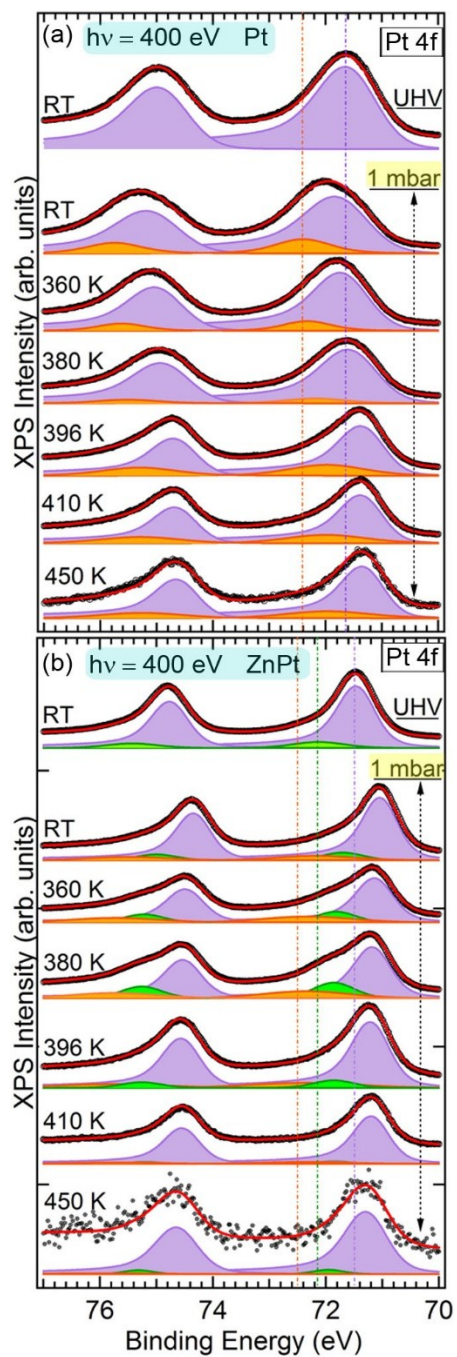

Figure S4. Pt 4f spectra of the pure Pt and ZnPt NPs measured at  $h\nu = 400$  eV in a mixture of CO:O<sub>2</sub> (1:4) under a total pressure of 1 mbar. The spectra denoted UHV are recorded at room temperature (RT) before exposure to gases. RT = 293 K.

Table S1: fitting parameters of Pt 4f spectra in pure Pt NPs recorded at  $h\nu = 400$  eV and shown in Fig. S 4(a)

|              | <b>Pt<sup>0</sup> (Pt<sub>met</sub>)</b> |                                     | <b>Pt<sup>2+</sup> (PtO)</b>        |                                     |
|--------------|------------------------------------------|-------------------------------------|-------------------------------------|-------------------------------------|
|              | FWHM = 0.124<br>Asym = 0.205             |                                     | FWHM = 0.41                         |                                     |
|              | <b>BE<br/>(Pt 4f<sub>7/2</sub>)</b>      | <b>BE<br/>(Pt 4f<sub>5/2</sub>)</b> | <b>BE<br/>(Pt 4f<sub>7/2</sub>)</b> | <b>BE<br/>(Pt 4f<sub>5/2</sub>)</b> |
| <b>UHV</b>   | 71.52                                    | 74.87                               | --                                  | --                                  |
| <b>RT</b>    | 71.70                                    | 75.05                               | 72.40                               | 75.75                               |
| <b>360 K</b> | 71.44                                    | 74.74                               | 72.17                               | 75.63                               |
| <b>380 K</b> | 71.48                                    | 74.81                               | 72.18                               | 75.51                               |
| <b>396 K</b> | 71.29                                    | 74.62                               | 71.99                               | 75.32                               |
| <b>410 K</b> | 71.30                                    | 74.60                               | 72.00                               | 75.30                               |
| <b>450 K</b> | 71.26                                    | 74.56                               | 71.96                               | 75.26                               |

Table S2: fitting parameters of Pt 4f spectra in bimetallic ZnPt NPs recorded at  $h\nu = 400$  eV and shown in Fig. S 4(b)

|              | <b>Pt<sup>0</sup> (Pt<sub>met</sub>)</b> |                                     | <b>Pt (ZnPt alloy)</b>              |                                     | <b>Pt<sup>2+</sup> (PtO)</b>        |                                     |
|--------------|------------------------------------------|-------------------------------------|-------------------------------------|-------------------------------------|-------------------------------------|-------------------------------------|
|              | FWHM = 0.271<br>Asym = 0.115             |                                     | FWHM = 0.1                          |                                     | FWHM = 0.05                         |                                     |
|              | <b>BE<br/>(Pt 4f<sub>7/2</sub>)</b>      | <b>BE<br/>(Pt 4f<sub>5/2</sub>)</b> | <b>BE<br/>(Pt 4f<sub>7/2</sub>)</b> | <b>BE<br/>(Pt 4f<sub>5/2</sub>)</b> | <b>BE<br/>(Pt 4f<sub>7/2</sub>)</b> | <b>BE<br/>(Pt 4f<sub>5/2</sub>)</b> |
| <b>UHV</b>   | 71.43                                    | 74.73                               | 72.13                               | 75.43                               | --                                  | --                                  |
| <b>RT</b>    | 71.01                                    | 74.31                               | 71.70                               | 75.00                               | 72.19                               | 75.49                               |
| <b>360 K</b> | 71.10                                    | 74.45                               | 71.82                               | 75.22                               | 72.32                               | 75.72                               |
| <b>380 K</b> | 71.14                                    | 74.49                               | 71.86                               | 75.26                               | 72.35                               | 75.75                               |
| <b>396 K</b> | 71.17                                    | 74.52                               | 71.86                               | 75.26                               | 72.38                               | 75.78                               |
| <b>410 K</b> | 71.16                                    | 74.51                               | 71.85                               | 75.20                               | 72.37                               | 75.72                               |
| <b>450 K</b> | 71.25                                    | 74.60                               | 71.96                               | 75.32                               | 72.52                               | 75.93                               |

### S5. Pt 4f spectra recorded at photon energy $h\nu = 165$ eV

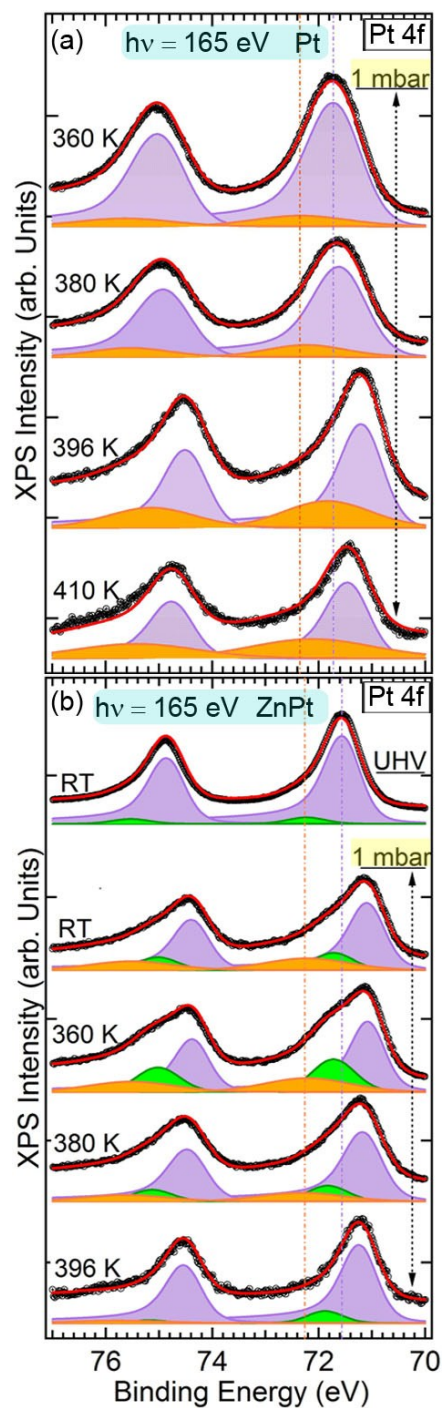

Figure S5. Pt 4f spectra of the pure Pt and ZnPt NP samples measured at  $h\nu = 165$  eV in a mixture of CO:O<sub>2</sub> (1:4) under a total pressure of 1 mbar. The spectra denoted UHV are recorded at room temperature (RT) before exposure to gases. RT = 293 K.

S6. Pt 4f and Zn 3p spectra recorded at photon energy  $h\nu = 400$  eV and  $h\nu = 165$  eV

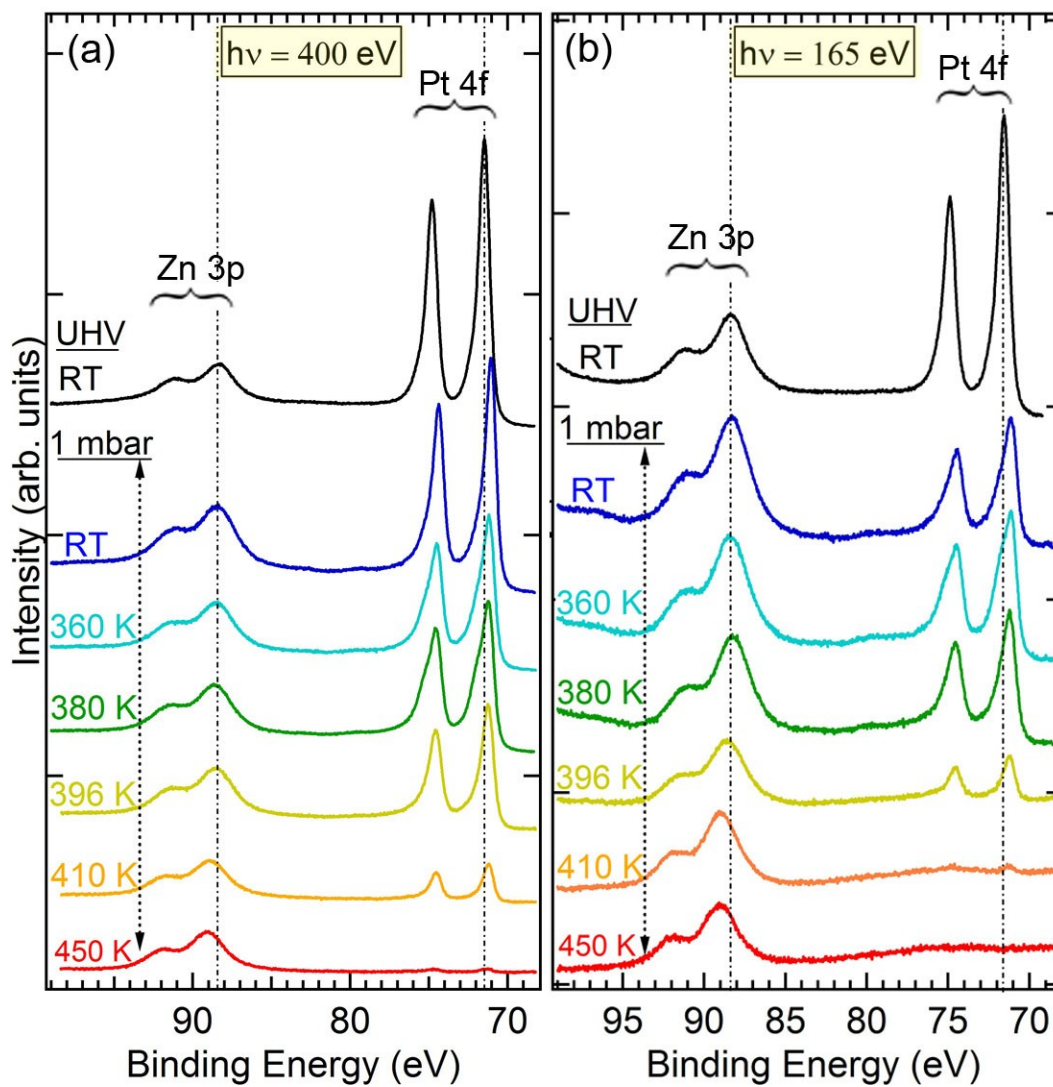

Figure S6. Pt 4f and Zn 3p binding energy region of the pure Pt and ZnPt NP samples measured at  $h\nu = 400$  eV (bulk sensitive conditions) and  $165$  eV (surface sensitive conditions) in a CO:O<sub>2</sub> mixture (1:4) and under a total pressure of 1 mbar. The spectra denoted UHV are recorded at room temperature (RT) before exposure to gases. RT = 293 K.



## References

1. Kempgens, B.; Maier, K.; Kivimaki, A.; Koppe, H. M.; Neeb, M., Vibrational excitation in C 1s and O 1s photoionization of CO. *J Phys B-at Mol Opt* **1997**, *30*, L741-L747.
